# Supplementary material
Source: PubMed Central journal article supplement (PMC3094149)
Supplement: supp_00316.2010_legends.pdf [file supp_00316.2010_legends.pdf]

**Suppl Figure 1.** *Efficiency of constructs transfection in HSCs*

Representative figures showing the transfection efficiency of constructs herein used in CFSC-2G (**A**) and LX-2 (**B**) cells. For this purpose, CFSC-2G cells were transfected with a FITC-coupled control siRNA and LX-2 cells with the pRNATin-H1.4/Lenti plasmid. Cells were trypsinized and directly mounted and photographed under a fluorescent microscope.

**Suppl Table I.** *Genes (84) up- and down-regulated associated with SPARC modulation using a rat extracellular matrix and adhesion molecules PCR array.*
