# Supplementary material
Source: PubMed Central journal article supplement (PMC3094149)
Supplement: supp_00316.2010_tableS1.pdf [file supp_00316.2010_tableS1.pdf]

1 **Supplementary Table 1.** Genes (84) up- and down-regulated associated with SPARC  
 2 modulation.

| <b>Gene symbol</b> | <b>Ref seq</b> | <b>Gene name</b>                                           | <b>Fold Change</b> |
|--------------------|----------------|------------------------------------------------------------|--------------------|
| <b>Adamts1</b>     | NM_024400      | ADAM metalloproteinase with thrombospondin type 1 motif, 1 | 1,181              |
| <b>Adamts5</b>     | NM_198761      | ADAM metalloproteinase with thrombospondin type 1 motif, 5 | 0,9266             |
| <b>Adamts8</b>     | XM_235977      | ADAM metalloproteinase with thrombospondin type 1 motif, 8 | 4,8906             |
| <b>Catna1</b>      | NM_001007145   | Catenin (cadherin associated protein), alpha 1             | 1,3947             |
| <b>Ctnna2</b>      | XM_232077      | Catenin (cadherin associated protein), alpha 2             | 0,6736             |
| <b>Cd44</b>        | NM_012924      | Cd44 molecule                                              | 1,8404             |
| <b>Cdh1</b>        | NM_031334      | Cadherin 1                                                 | 9,7811             |
| <b>Cdh2</b>        | NM_031333      | Cadherin 2                                                 | 0,3789             |
| <b>Cdh3</b>        | XM_226426      | Cadherin 3, type 1, P-cadherin (placental)                 | 1,2924             |
| <b>Cdh4</b>        | XM_001061943   | Cadherin 4                                                 | 1,2924             |
| <b>Cntn1</b>       | NM_057118      | Contactin 1                                                | 1,057              |
| <b>Coll1a1</b>     | XM_213440      | Collagen, type I, alpha 1                                  | 1,2397             |
| <b>Col2a1</b>      | NM_012929      | Collagen, type II, alpha 1                                 | 1,8921             |
| <b>Col3a1</b>      | NM_032085      | Collagen, type III, alpha 1                                | 1,3947             |
| <b>Col4a1</b>      | XM_214400      | Collagen, type IV, alpha 1                                 | 1,2311             |
| <b>Col4a2</b>      | XM_225043      | Collagen, type IV, alpha 2                                 | 1,5157             |
| <b>Col4a3</b>      | XM_343607      | Collagen, type IV, alpha 3                                 | 1,7777             |
| <b>Col5a1</b>      | NM_134452      | Collagen, type V, alpha 1                                  | 0,9075             |
| <b>Col6a1</b>      | XM_215375      | Collagen, type VI, alpha 1                                 | 1,0425             |
| <b>Col8a1</b>      | XM_221536      | Collagen, type VIII, alpha 1                               | 1,6245             |
| <b>Vcan</b>        | XM_215451      | Versican                                                   | 0,9202             |
| <b>Ctgf</b>        | NM_022266      | Connective tissue growth factor                            | 0,9727             |
| <b>Ctnnb1</b>      | NM_053357      | Catenin (cadherin associated protein), beta 1              | 1,3566             |
| <b>Ecm1</b>        | NM_053882      | Extracellular matrix protein 1                             | 0,8293             |
| <b>Emilin1</b>     | XM_238447      | Elastin microfibril interfacier 1                          | 1,2142             |
| <b>Entpd1</b>      | NM_022587      | Ectonucleoside triphosphate diphosphohydrolase 1           | 2,0562             |
| <b>Fbln1</b>       | XM_243637      | Fibulin 1                                                  | 1,4743             |
| <b>Fn1</b>         | NM_019143      | Fibronectin 1                                              | 1,3472             |
| <b>Hapln1</b>      | NM_019189      | Hyaluronan and proteoglycan link protein 1                 | 1,2746             |

|               |              |                                                        |        |
|---------------|--------------|--------------------------------------------------------|--------|
| <b>Icam1</b>  | NM_012967    | Intercellular adhesion molecule 1                      | 1,1975 |
| <b>Itga2</b>  | XM_345156    | Integrin, alpha 2                                      | 0,8827 |
| <b>Itga3</b>  | XM_340884    | Integrin alpha 3                                       | 1,5476 |
| <b>Itga4</b>  | XM_230033    | Integrin alpha 4                                       | 0,7631 |
| <b>Itga5</b>  | XM_235707    | Integrin alpha 5 (fibronectin receptor alpha)          | 0,9266 |
| <b>Itgad</b>  | NM_031691    | Integrin, alpha D                                      | 0,2102 |
| <b>Itgae</b>  | NM_031768    | Integrin, alpha E, epithelial-associated               | 0,9526 |
| <b>Itgal</b>  | NM_001033998 | Integrin alpha L                                       | 0,7526 |
| <b>Itgam</b>  | NM_012711    | Integrin alpha M                                       | 0,9526 |
| <b>Itgav</b>  | XM_230950    | Integrin alpha V                                       | 1,2483 |
| <b>Itgb1</b>  | NM_017022    | Integrin beta 1 (fibronectin receptor beta)            | 1,6245 |
| <b>Itgb2</b>  | XM_001069791 | Integrin beta 2                                        | 0,8706 |
| <b>Itgb3</b>  | NM_153720    | Integrin beta 3                                        | 0,8827 |
| <b>Itgb4</b>  | NM_013180    | Integrin beta 4                                        | 1,2397 |
| <b>Lama1</b>  | XM_237536    | Laminin, alpha 1                                       | 1,1096 |
| <b>Lama2</b>  | XM_219866    | Laminin, alpha 2                                       | 1,0867 |
| <b>Lama3</b>  | XM_226159    | Laminin, alpha 3                                       | 1,6586 |
| <b>Lamb2</b>  | NM_012974    | Laminin, beta 2                                        | 0,895  |
| <b>Lamb3</b>  | XM_223087    | Laminin, beta 3                                        | 1,2834 |
| <b>Lamc1</b>  | XM_341133    | Laminin, gamma 1                                       | 1,0644 |
| <b>Mmp10</b>  | NM_133514    | Matrix metalloproteinase 10                            | 1,3104 |
| <b>Mmp11</b>  | NM_012980    | Matrix metalloproteinase 11                            | 1,1329 |
| <b>Mmp12</b>  | NM_053963    | Matrix metalloproteinase 12                            | 0,6199 |
| <b>Mmp13</b>  | XM_343345    | Matrix metalloproteinase 13                            | 2,2974 |
| <b>Mmp14</b>  | NM_031056    | Matrix metalloproteinase 14 (membrane-inserted)        | 1,5583 |
| <b>Mmp15</b>  | XM_238034    | Matrix metalloproteinase 15                            | 1,7171 |
| <b>Mmp16</b>  | NM_080776    | Matrix metalloproteinase 16                            | 1,454  |
| <b>Mmp1a</b>  | XM_235794    | Matrix metalloproteinase 1a (interstitial collagenase) | 0,8123 |
| <b>Mmp2</b>   | NM_031054    | Matrix metalloproteinase 2                             | 1,057  |
| <b>Mmp3</b>   | NM_133523    | Matrix metalloproteinase 3                             | 1,0943 |
| <b>Mmp7</b>   | NM_012864    | Matrix metalloproteinase 7                             | 0,8586 |
| <b>Mmp8</b>   | NM_022221    | Matrix metalloproteinase 8                             | 1,2311 |
| <b>Mmp9</b>   | NM_031055    | Matrix metalloproteinase 9                             | 0,9461 |
| <b>Ncam1</b>  | NM_031521    | Neural cell adhesion molecule 1                        | 1,3013 |
| <b>Ncam2</b>  | NM_203409    | Neural cell adhesion molecule 2                        | 0,8123 |
| <b>Pecam1</b> | NM_031591    | Platelet/endothelial cell adhesion molecule 1          | 1,6472 |

|                |              |                                                                          |        |
|----------------|--------------|--------------------------------------------------------------------------|--------|
| <b>Postn</b>   | XM_342245    | Periostin, osteoblast specific factor                                    | 1,1251 |
| <b>Adamts2</b> | XM_213548    | ADAM metallopeptidase with thrombospondin type 1 motif, 2                | 0,6462 |
| <b>Sele</b>    | NM_138879    | Selectin, endothelial cell                                               | 1,5369 |
| <b>Sell</b>    | NM_019177    | Selectin, lymphocyte                                                     | 0,9526 |
| <b>Selp</b>    | NM_013114    | Selectin, platelet                                                       | 0,6878 |
| <b>Sgce</b>    | NM_001002023 | Sarcoglycan, epsilon                                                     | 2,4623 |
| <b>Sparc</b>   | NM_012656    | Secreted protein, acidic, cysteine-rich (osteonectin)                    | 0,6373 |
| <b>Spock1</b>  | XM_225160    | Sparc/osteonectin, cwcv and kazal-like domains proteoglycan (testican) 1 | 1,2924 |
| <b>Spp1</b>    | NM_012881    | Secreted phosphoprotein 1                                                | 1,057  |
| <b>Syt1</b>    | NM_001033680 | Synaptotagmin I                                                          | 2,9897 |
| <b>Tgfb1</b>   | XM_573983    | Transforming growth factor, beta 1                                       | 0,6736 |
| <b>Thbs1</b>   | NM_001013062 | Thrombospondin 1                                                         | 1,9185 |
| <b>Thbs2</b>   | XM_214778    | Thrombospondin 2                                                         | 1,8661 |
| <b>Timp1</b>   | NM_053819    | TIMP metallopeptidase inhibitor 1                                        | 1,0867 |
| <b>Timp2</b>   | NM_021989    | TIMP metallopeptidase inhibitor 2                                        | 1,0718 |
| <b>Timp3</b>   | NM_012886    | TIMP metallopeptidase inhibitor 3                                        | 1,3195 |
| <b>Tnc</b>     | NM_053861    | Tenascin C                                                               | 1,4241 |
| <b>Vcam1</b>   | NM_012889    | Vascular cell adhesion molecule 1                                        | 1,6021 |
| <b>Vtn</b>     | NM_019156    | Vitronectin                                                              | 0,7955 |
