# Supplementary material
Source: PubMed Central journal article supplement (PMC3094149)

**A****CFSC-2G**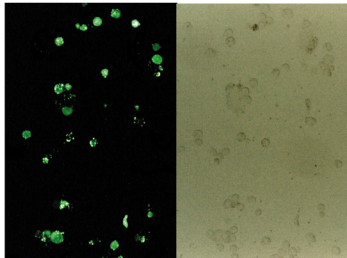**UV light****White light****B****LX2**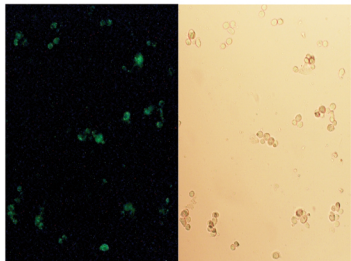**UV light****White light**

Supplement: supp_00316.2010_figS1.pdf [file supp_00316.2010_figS1.pdf]
